# Supplementary material for: New polymorphic hydrogen bonding donor–acceptor system with two temperature coincident solid–solid transitions
Source: Royal Society of Chemistry journal article supplement (doi:10.1039/b813086h), 2008-10-29
Supplement: b813086h.pdf [file b813086h.pdf]

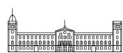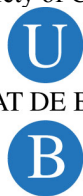

Supplementary Information.

Reference: "New polymorphic hydrogen bonding donor-acceptor system with two temperature coincident solid-solid transitions"

**Table 1** Most important two theta positions ( $2\theta/^\circ$ ) and relative intensities ( $I$ ) of the powder X-ray diffraction patterns of DBSQ crystal forms.

| Form A           |         | Form B           |         | Form C           |         |
|------------------|---------|------------------|---------|------------------|---------|
| $2\theta/^\circ$ | $I$ (%) | $2\theta/^\circ$ | $I$ (%) | $2\theta/^\circ$ | $I$ (%) |
| 5.957            | 100.00  | 5.825            | 100.00  | 5.817            | 36.29   |
| 15.822           | 89.79   | 17.511           | 4.35    | 14.942           | 10.93   |
| 17.916           | 62.46   | 17.942           | 20.60   | 17.076           | 14.09   |
| 21.642           | 15.77   | 19.484           | 4.73    | 17.512           | 7.72    |
| 22.064           | 7.40    | 20.984           | 9.55    | 18.277           | 100.00  |
| 22.855           | 40.96   | 21.193           | 13.04   | 18.585           | 10.74   |
| 23.985           | 12.53   | 21.807           | 76.50   | 20.816           | 40.89   |
| 25.497           | 11.15   | 22.582           | 12.47   | 21.865           | 57.96   |
| 27.234           | 23.66   | 24.111           | 14.89   | 23.200           | 42.42   |
| 31.362           | 10.10   | 25.524           | 6.82    | 23.485           | 17.42   |
| 31.981           | 9.15    | 25.768           | 24.37   | 24.232           | 8.56    |
| 33.668           | 14.85   | 25.974           | 24.53   | 25.968           | 7.93    |
|                  |         | 26.683           | 6.24    | 26.389           | 32.18   |
|                  |         | 27.865           | 6.17    | 26.792           | 14.25   |
|                  |         | 31.989           | 8.82    | 28.617           | 8.88    |
|                  |         | 32.238           | 10.19   | 30.163           | 16.62   |
|                  |         |                  |         | 31.879           | 9.29    |



**Figure 1.** Variable heating rate DSC experiments of form B.

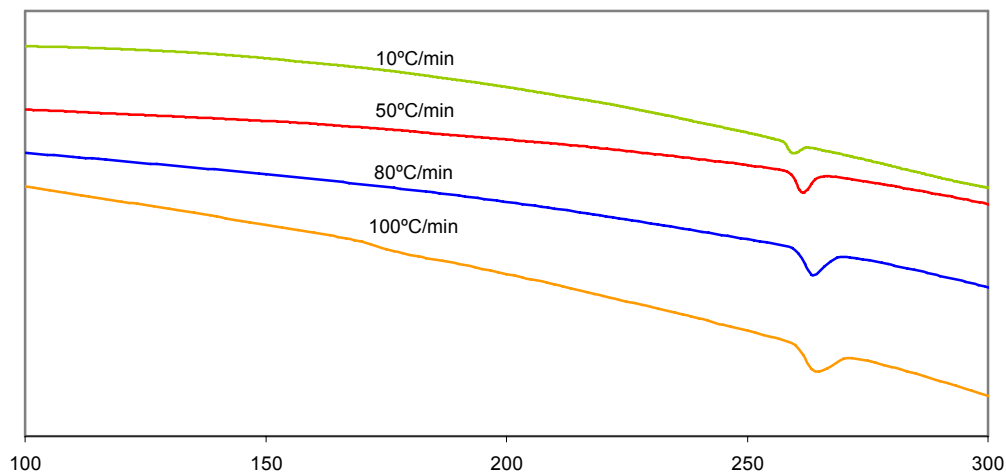

**Table 2** Onset and Peak values of the solid-solid transition observed at different heating rates of form B.

| Heating rate (°C/min) | Onset (°C) | Peak (°C) |
|-----------------------|------------|-----------|
| 10                    | 257.6      | 259.4     |
| 50                    | 258.1      | 261.5     |
| 80                    | 258.8      | 263.0     |
| 100                   | 258.8      | 264.4     |
